# Supplementary material
Source: Research Square preprint supplement (doi:10.21203/rs.3.rs-10419736/v1)
Supplement: Supplementary file 2 [file d4cc9ba92fdc637a0395871a.xlsx]

## Sheet: Table S1
	BEFORE SAMPLING		RANDOM SAMPLING			POLES		GRADIENT SAMPLING
						SAMPLING
	No filter	Bi-allelic		MAF	Pruning	MAF	Pruning	MAF	Pruning
Migration rate (m)
0.001	4,310,299	4,236,524		363654	75762	363557	75614	363510	75735
0.01	4,299,686	4,268,103		361893	75735	361696	75505	361465	75554
0.0255	4,301,892	4,270,699		363016	75952	362733	75742	362789	75890
0.05	4,307,606	4,276,569		362360	75807	362079	75774	362116	75699

## Sheet: Table S2
	Random Sampling				Poles Sampling				Gradient Sampling
	m=0.001	m=0.01	m=0.0255	m=0.05	m=0.001	m=0.01	m=0.0255	m=0.05	m=0.001	m=0.01	m=0.0255	m=0.05
Mclust PBWT-Paint	1.000 ± 0.000	1.000 ± 0.000	0.951 ± 0.001	0.733 ± 0.002	1.000 ± 0.000	0.999 ± 0.000	0.916 ± 0.003	0.714 ± 0.002	1.000 ± 0.000	1.000 ± 0.000	0.932 ± 0.002	0.736 ± 0.001
Leiden PBWT-Paint (res. 0.02)	1.000 ± 0.000	1.000 ± 0.000	0.920 ± 0.000	0.495 ± 0.001	1.000 ± 0.000	1.000 ± 0.000	0.868 ± 0.002	0.514 ± 0.001	1.000 ± 0.000	1.000 ± 0.000	0.860 ± 0.000	0.536 ± 0.001
Mclust HapIBD	1.000 ± 0.000	0.937 ± 0.000	0.548 ± 0.003	0.288 ± 0.003	1.000 ± 0.000	0.890 ± 0.002	0.593 ± 0.002	0.347 ± 0.003	0.995 ± 0.000	0.896 ± 0.001	0.664 ± 0.002	0.342 ± 0.002
Leiden HapIBD fixed (res. 0.02)	1.000 ± 0.000	0.954 ± 0.000	0.576 ± 0.002	0.263 ± 0.001	1.000 ± 0.000	0.920 ± 0.000	0.587 ± 0.002	0.273 ± 0.001	0.999 ± 0.000	0.896 ± 0.001	0.630 ± 0.002	0.254 ± 0.001
Mclust SNPs-only	1.000 ± 0.000	0.413 ± 0.001	0.117 ± 0.003	0.006 ± 0.000	0.999 ± 0.000	0.446 ± 0.001	0.179 ± 0.001	0.012 ± 0.000	0.982 ± 0.001	0.473 ± 0.001	0.146 ± 0.001	0.010 ± 0.000
Leiden SNPs-only (res. 0.02)	1.000 ± 0.000	0.214 ± 0.001	0.053 ± 0.000	0.008 ± 0.000	0.999 ± 0.000	0.220 ± 0.001	0.073 ± 0.000	0.011 ± 0.000	0.963 ± 0.000	0.241 ± 0.001	0.057 ± 0.000	0.010 ± 0.000
FineSTRUCTURE	0.910 ± NA	0.951 ± NA	0.842 ± NA	0.602 ± NA	0.887 ± NA	0.897 ± NA	0.814 ± NA	0.593 ± NA	0.907 ± NA	0.920 ± NA	0.845 ± NA	0.630 ± NA

## Sheet: Table S3
	Random Sampling				Poles Sampling				Gradient Sampling
	m=0.001	m=0.01	m=0.0255	m=0.05	m=0.001	m=0.01	m=0.0255	m=0.05	m=0.001	m=0.01	m=0.0255	m=0.05
Mclust PBWT-Paint	1.000 ± 0.000	1.000 ± 0.000	0.939 ± 0.003	0.573 ± 0.003	1.000 ± 0.000	1.000 ± 0.000	0.842 ± 0.011	0.568 ± 0.007	1.000 ± 0.000	1.000 ± 0.000	0.921 ± 0.005	0.616 ± 0.005
Leiden PBWT-Paint (res. 0.02)	1.000 ± 0.000	1.000 ± 0.000	0.899 ± 0.000	0.309 ± 0.001	1.000 ± 0.000	1.000 ± 0.000	0.865 ± 0.002	0.460 ± 0.002	1.000 ± 0.000	1.000 ± 0.000	0.849 ± 0.001	0.478 ± 0.002
Mclust HapIBD	1.000 ± 0.000	0.898 ± 0.000	0.385 ± 0.003	0.147 ± 0.002	1.000 ± 0.000	0.860 ± 0.002	0.516 ± 0.004	0.236 ± 0.003	0.997 ± 0.000	0.895 ± 0.002	0.594 ± 0.004	0.197 ± 0.001
Leiden HapIBD fixed (res. 0.02)	1.000 ± 0.000	0.967 ± 0.000	0.454 ± 0.002	0.187 ± 0.001	1.000 ± 0.000	0.952 ± 0.000	0.574 ± 0.002	0.281 ± 0.000	1.000 ± 0.000	0.886 ± 0.002	0.580 ± 0.002	0.203 ± 0.001
Mclust SNPs-only	1.000 ± 0.000	0.229 ± 0.001	0.047 ± 0.002	0.002 ± 0.000	1.000 ± 0.000	0.358 ± 0.004	0.139 ± 0.004	0.004 ± 0.000	0.984 ± 0.003	0.389 ± 0.003	0.087 ± 0.003	0.002 ± 0.000
Leiden SNPs-only (res. 0.02)	1.000 ± 0.000	0.125 ± 0.001	0.012 ± 0.000	0.001 ± 0.000	1.000 ± 0.000	0.231 ± 0.002	0.034 ± 0.001	0.003 ± 0.000	0.960 ± 0.000	0.237 ± 0.001	0.017 ± 0.000	0.002 ± 0.000
FineSTRUCTURE	0.825 ± 0.000	0.898 ± 0.000	0.726 ± 0.000	0.356 ± 0.000	0.718 ± 0.000	0.707 ± 0.000	0.612 ± 0.000	0.347 ± 0.000	0.809 ± 0.000	0.809 ± 0.000	0.733 ± 0.000	0.420 ± 0.000

## Sheet: Table S4
	Random Sampling				Poles Sampling				Gradient Sampling
	m=0.001	m=0.01	m=0.0255	m=0.05	m=0.001	m=0.01	m=0.0255	m=0.05	m=0.001	m=0.01	m=0.0255	m=0.05
Mclust PBWT-Paint	1.000 ± 0.000	1.000 ± 0.000	0.908 ± 0.005	0.360 ± 0.006	1.000 ± 0.000	0.999 ± 0.000	0.689 ± 0.021	0.251 ± 0.012	1.000 ± 0.000	0.999 ± 0.000	0.798 ± 0.013	0.314 ± 0.007
Leiden PBWT-Paint (res. 0.02)	1.000 ± 0.000	1.000 ± 0.000	0.841 ± 0.004	-0.313 ± 0.013	1.000 ± 0.000	1.000 ± 0.000	0.463 ± 0.024	-0.309 ± 0.026	1.000 ± 0.000	1.000 ± 0.000	0.328 ± 0.007	-0.208 ± 0.026
Mclust HapIBD	1.000 ± 0.000	0.864 ± 0.000	0.158 ± 0.005	-0.084 ± 0.007	1.000 ± 0.000	0.763 ± 0.005	0.215 ± 0.009	-0.063 ± 0.008	0.977 ± 0.000	0.799 ± 0.004	0.372 ± 0.008	-0.058 ± 0.004
Leiden HapIBD fixed (res. 0.02)	1.000 ± 0.000	0.866 ± 0.000	-0.186 ± 0.016	-0.535 ± 0.012	1.000 ± 0.000	0.756 ± 0.000	-0.174 ± 0.024	-0.635 ± 0.019	0.997 ± 0.000	0.840 ± 0.001	-0.330 ± 0.022	-0.479 ± 0.015
Mclust SNPs-only	1.000 ± 0.000	-0.077 ± 0.004	-0.199 ± 0.003	-0.108 ± 0.002	0.999 ± 0.000	-0.020 ± 0.007	-0.168 ± 0.006	-0.138 ± 0.002	0.922 ± 0.008	0.051 ± 0.005	-0.187 ± 0.004	-0.133 ± 0.003
Leiden SNPs-only (res. 0.02)	1.000 ± 0.000	-0.461 ± 0.013	-0.501 ± 0.012	-0.495 ± 0.015	0.999 ± 0.000	-0.539 ± 0.015	-0.567 ± 0.014	-0.550 ± 0.017	0.880 ± 0.000	-0.454 ± 0.017	-0.523 ± 0.016	-0.516 ± 0.017
FineSTRUCTURE	0.648 ± NA	0.835 ± NA	0.579 ± NA	0.024 ± NA	0.351 ± NA	0.458 ± NA	0.297 ± NA	-0.046 ± NA	0.538 ± NA	0.559 ± NA	0.428 ± NA	0.039 ± NA

## Sheet: Table S5
	Random Sampling				Poles Sampling				Gradient Sampling
	m=0.001	m=0.01	m=0.0255	m=0.05	m=0.001	m=0.01	m=0.0255	m=0.05	m=0.001	m=0.01	m=0.0255	m=0.05
Mclust PBWT-Paint	0.000 ± 0.000	0.000 ± 0.000	0.482 ± 0.061	1.629 ± 0.126	0.000 ± 0.000	0.052 ± 0.000	4.825 ± 0.879	2.347 ± 0.133	0.000 ± 0.000	0.046 ± 0.000	2.046 ± 0.246	2.485 ± 0.158
Leiden PBWT-Paint (res. 0.02)	0.000 ± 0.000	0.000 ± 0.000	0.652 ± 0.071	13.111 ± 0.557	0.000 ± 0.000	0.034 ± 0.000	3.576 ± 0.478	12.849 ± 0.590	0.000 ± 0.000	0.028 ± 0.000	6.077 ± 0.377	13.869 ± 0.766
Mclust HapIBD	0.000 ± 0.000	1.808 ± 0.080	33.071 ± 4.135	41.071 ± 4.317	0.000 ± 0.000	3.751 ± 0.667	18.971 ± 1.867	33.685 ± 2.740	0.494 ± 0.010	3.580 ± 0.291	9.270 ± 0.624	25.558 ± 1.508
Leiden HapIBD fixed (res. 0.02)	0.000 ± 0.000	7.859 ± 0.022	30.443 ± 4.524	33.416 ± 3.139	0.000 ± 0.000	7.633 ± 0.407	18.379 ± 0.659	25.495 ± 1.970	0.196 ± 0.000	2.980 ± 0.006	15.259 ± 0.722	29.863 ± 1.909
Mclust SNPs-only	0.015 ± 0.000	5.796 ± 0.374	21.227 ± 1.357	73.856 ± 4.907	0.042 ± 0.000	9.366 ± 0.716	23.799 ± 1.990	59.429 ± 4.374	1.112 ± 0.039	6.815 ± 0.378	20.989 ± 1.268	71.477 ± 13.499
Leiden SNPs-only (res. 0.02)	0.015 ± 0.000	27.372 ± 1.040	46.531 ± 1.820	98.597 ± 3.706	0.046 ± 0.000	31.261 ± 4.127	46.691 ± 2.766	98.118 ± 20.940	1.439 ± 0.000	27.566 ± 1.208	50.481 ± 5.214	98.103 ± 10.786
FineSTRUCTURE	3.093 ± NA	1.079 ± NA	1.298 ± NA	3.183 ± NA	3.466 ± NA	3.722 ± NA	8.165 ± NA	7.549 ± NA	3.163 ± NA	2.118 ± NA	6.218 ± NA	4.815 ± NA

## Sheet: Table S6
		Random Sampling				Poles Sampling				Gradient Sampling
	Score	m=0.001	m=0.01	m=0.0255	m=0.05	m=0.001	m=0.01	m=0.0255	m=0.05	m=0.001	m=0.01	m=0.0255	m=0.05
Mclust PBWT-Paint	AMI	0.984	0.993	0.953	0.743	0.990	0.948	0.887	0.704	0.995	0.916	0.917	0.735
Leiden PBWT-Paint		1.000	1.000	0.380	0.485	1.000	1.000	0.419	0.195	1.000	1.000	0.796	0.519
Mclust HapIBD		0.983	0.929	0.592	0.323	0.995	0.872	0.583	0.349	0.992	0.880	0.617	0.347
Leiden HapIBD		1.000	0.957	0.384	0.274	1.000	0.660	0.168	0.316	0.968	0.759	0.170	0.000
Mclust PBWT-Paint	ARI	0.980	0.992	0.945	0.596	0.990	0.880	0.783	0.556	0.995	0.832	0.906	0.634
Leiden PBWT-Paint		1.000	1.000	0.184	0.307	1.000	1.000	0.257	0.097	1.000	1.000	0.733	0.409
Mclust HapIBD		0.979	0.938	0.488	0.153	0.996	0.883	0.450	0.215	0.994	0.872	0.497	0.197
Leiden HapIBD		1.000	0.969	0.247	0.164	1.000	0.510	0.089	0.255	0.961	0.595	0.075	0.000
Mclust PBWT-Paint	Silhouette	0.924	0.968	0.915	0.388	0.955	0.757	0.580	0.210	0.976	0.584	0.763	0.376
Leiden PBWT-Paint		0.698	0.573	0.433	0.002	0.650	0.534	0.455	0.389	0.611	0.577	0.411	-0.073
Mclust HapIBD		0.920	0.898	0.104	-0.209	0.976	0.782	-0.009	-0.110	0.960	0.723	-0.038	-0.194
Leiden HapIBD		0.149	0.196	0.152	0.052	0.181	0.126	0.268	-0.150	0.329	0.294	0.303	-0.014
Mclust PBWT-Paint	DB	0.000	0.002	0.484	1.366	0.000	0.048	10.323	3.122	0.000	0.038	2.604	2.278
Leiden PBWT-Paint		0.472	0.631	0.808	2.975	0.562	0.717	0.732	1.229	1.389	0.769	0.847	15.190
Mclust HapIBD		0.000	2.874	14.417	32.124	0.000	5.798	17.820	30.200	0.515	3.102	12.986	23.760
Leiden HapIBD		2.866	4.397	11.085	48.935	22.708	1.735	1.621	19.752	14.454	1.415	1.322	33.986

## Sheet: Table S7
	m = 0.001				m = 0.01				m = 0.0255				m = 0.05
	Min	Mean	Median	Max	Min	Mean	Median	Max	Min	Mean	Median	Max	Min	Mean	Median	Max
Mclust PBWT-Paint	25	26.9	27	30	25	25.8	25	29	25	25.3	25	27	25	25.7	25.5	27
Leiden PBWT-Paint	25	25	25	25	25	25	25	25	3	3.7	4	4	20	25	25	28
FineSTRUCTURE (default)	24	30.8	30	37	8	21.3	24	28	3	6.4	7.5	9	3	4	4	5
Mclust HapIBD	25	27	26.5	29	27	27.9	28	30	48	56.7	56.5	63	48	57.7	53.5	74
Leiden HapIBD	25	25	25	25	28	28	28	28	3	15.2	20	21	23	24.7	25	26
